# Supplementary material for: Peritoneal Fluid Analysis of Advanced Ovarian Cancers after Hyperthermic Intraperitoneal Chemotherapy
Source: Int J Mol Sci. 2023 Jun 5;24(11):9748. doi: 10.3390/ijms24119748 (PMC10253890; doi:10.3390/ijms24119748)
Supplement: Supplementary file 1 [file ijms-24-09748-s001.zip › Patient list.xlsx]

## Sheet: 工作表1
Case	Birthday	OP date	BH	BW	BMI	Clinical stage	Pathologic stage	Histologt	Dx date	Left-upper-PCI	Mid-up-PCI	Right-up-PCI	Left	Mid	right	Left-low-PCI	Mid-low-PCI	Right-low-PCI	prox ileum	dist ileum	prox jejunum	dist jejunum	PCI score	CC	Other combined surgery	HIPEC regimen	NACT	POADJ	BRCA	HRD	CA125 diagosed	CA125 pre-OP	CA125 post-OP	CA125 response	CA125 nadir	CA125 PD	PD date	Current status	last FU
A	1955-09-13	2022-01-19	148.8	53.1	23.9822	4B (inguinal)	3C2	HGSC	2021-10-06	1	0	0	1	1	1	3	0	0	1	1	1	1	11	0	GS: peri/omen; Uro: partial cystectomy	Carbo5/Taxol135	Carbo5/Taxol135 x4	chemo x3	negative	negative	1387.4	52.5	41	20220613: 24.9	20220613: 24.9	20221007 73.4	20221007 CT PA, inguial, CP, 曾經CR in 20220706	AWD	2023-02-03
B	1972-12-08	2022-01-26	154.2	54.3	22.8366	3C2	3bN1b	HGSC	2021-11-08	0	0	0	0	0	1	1	2	2	0	0	0	0	6	0	GS: peri/omen; Uro: retroperitoneal mass	Carbo6/Taxol175	Carbo6/Taxol175x3	chemo x 3 then BEV mainten	negative	negative	2122.5	64	11.5	20220219: 11.5	20221021: 4.9			NED	2023-01-30
C	1965-06-11	2022-02-18	155.9	53.7	22.0944	3C2	3C2	HGSC	2021-11-09	2	1	2	0	3	2	2	2	2	0	0	0	0	16	0	GS:peri,omen	Carbo5/Taxol135	Carbo5/Taxol175x4	chemo x 6 then Olaparib due to BRCA +	postitive	negative	1620.7	51.5	113	20220511:15.2	20230106: 9.7			NED	2023-01-10
D	1962-01-21	2022-02-25	153.2	69.5	29.612	3C2	3C2	HGSC	2022-02-25	0	0	0	3	3	3	2	0	2	0	0	0	0	13	1 (mesentary)	GS: peri, omen, mesentary, ileum serosa	Carbo5/Taxol135	nil	Carbo5/Taxol135x6	negative	negative	300.7	300.7	20.3	20220413: 20.3	20220824: 8.7			NED	2022-12-22
E	1963-10-01	2022-05-18	159.7	55.1	21.6044	recurrence	3C2	LGSC	2021-07-20	0	0	0	2	3	0	0	0	0	0	0	0	0	5	0	GS: peri/omen	Carbo6/Taxol175	Carbo6/Taxol175 x 6 until 2021/11/15	PLD then Nira then Letrozole maintenance	negative	negative	397.2	17.2	28.3		20230108: 10.8			NED	2023-01-09
F	1965-05-13	2022-05-27	157	41	16.6335	4A	4A	HGSC	2022-04-25	0	0	0	0	1	0	3	1	1	0	0	0	0	6	0	nil	nil	nil	nil	nil	nil	3788.3	3788.3	12.7	20221102: 12.7	20221102: 12.7			NED	2022-12-30
